# Supplementary material
Source: PubMed Central journal article supplement (PMC9984389)

Figure 1

**e**

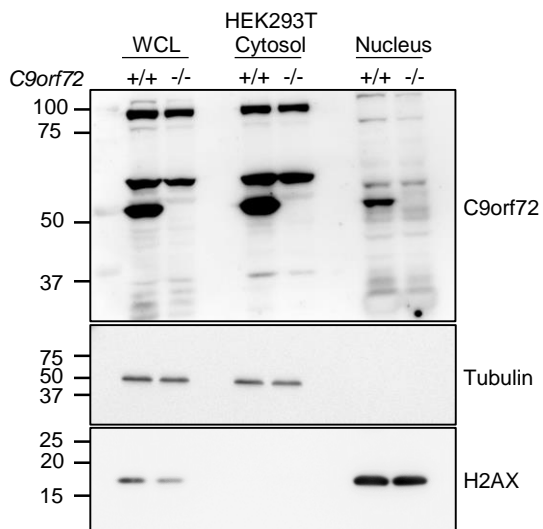

**f**

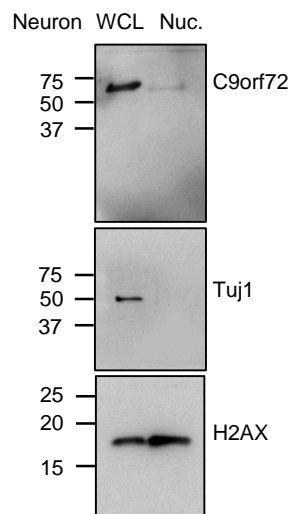

**i**

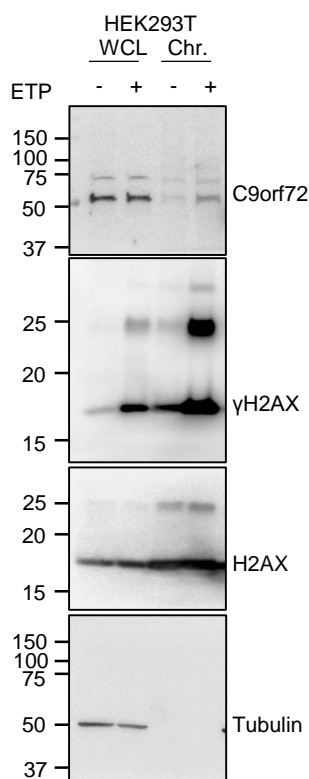

**j**

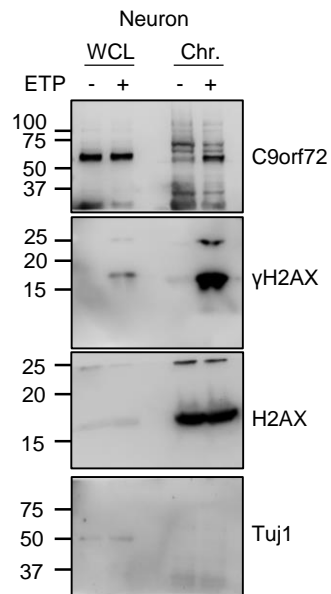

Figure 2

**b**

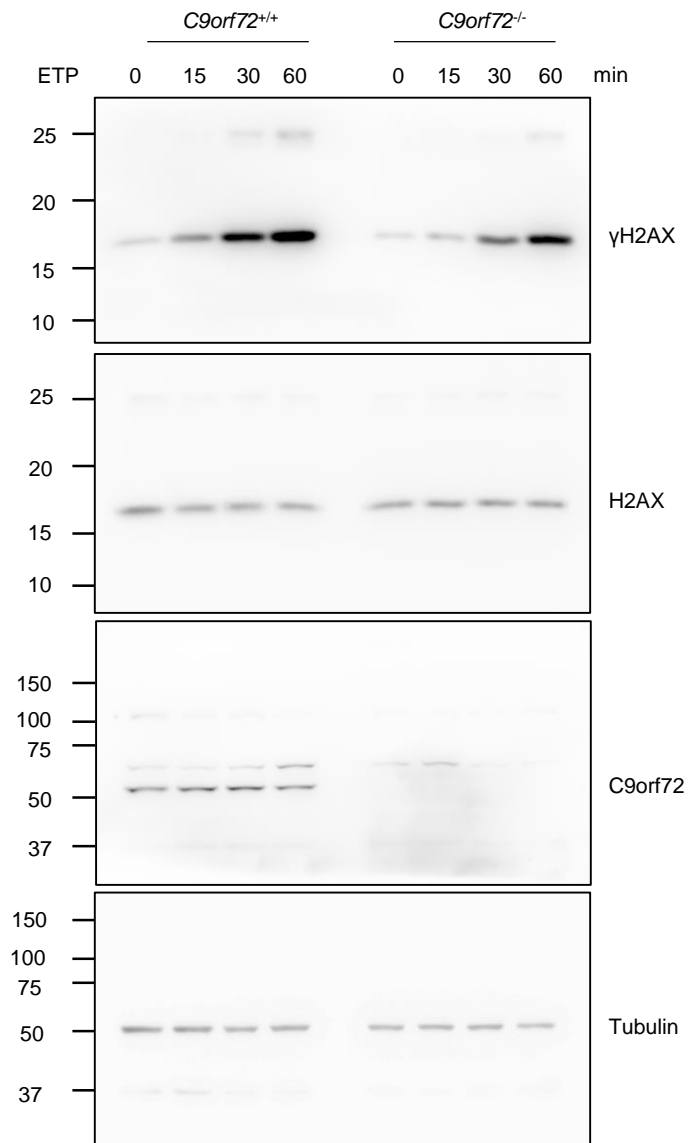

Figure 3

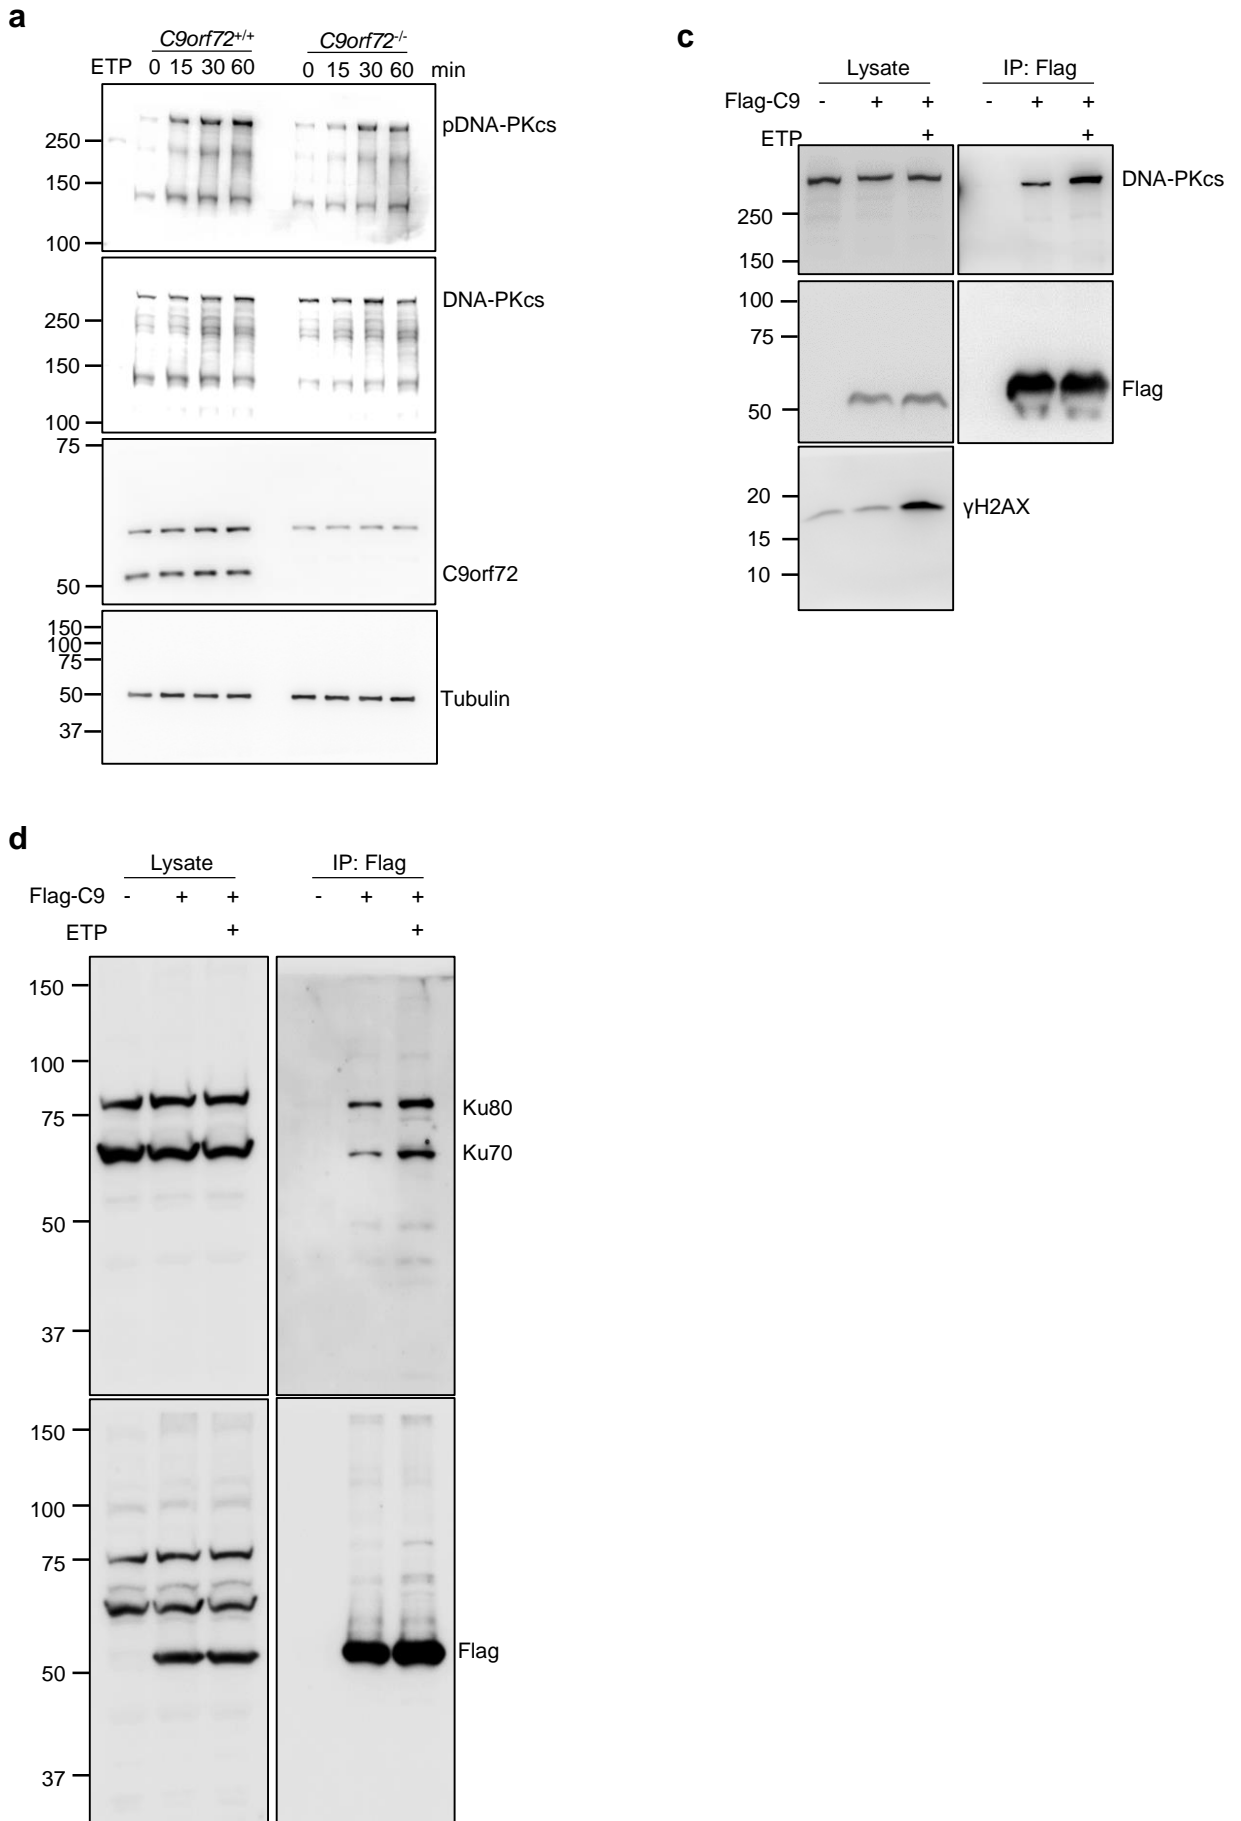

**Figure 4**

**a**

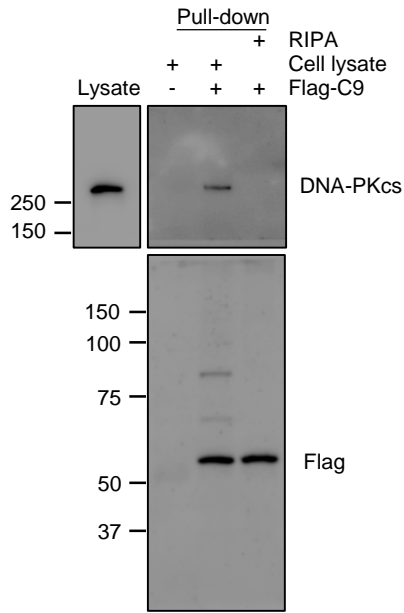

**b**

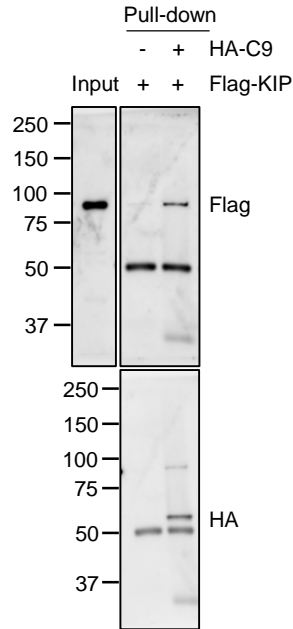

**c**

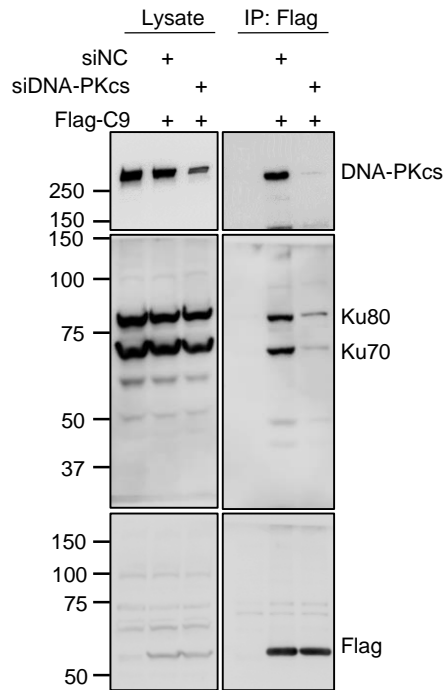

**d**

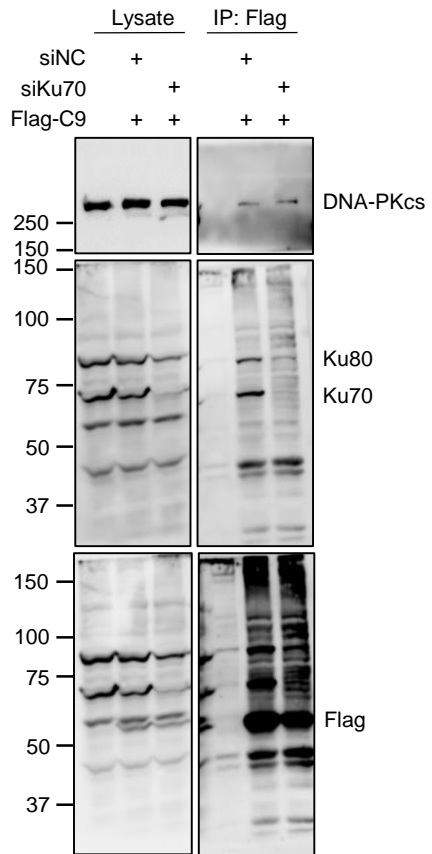

**f**

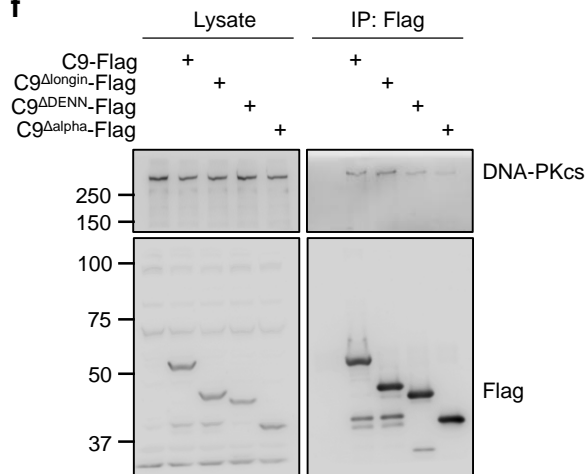

**Figure 5**

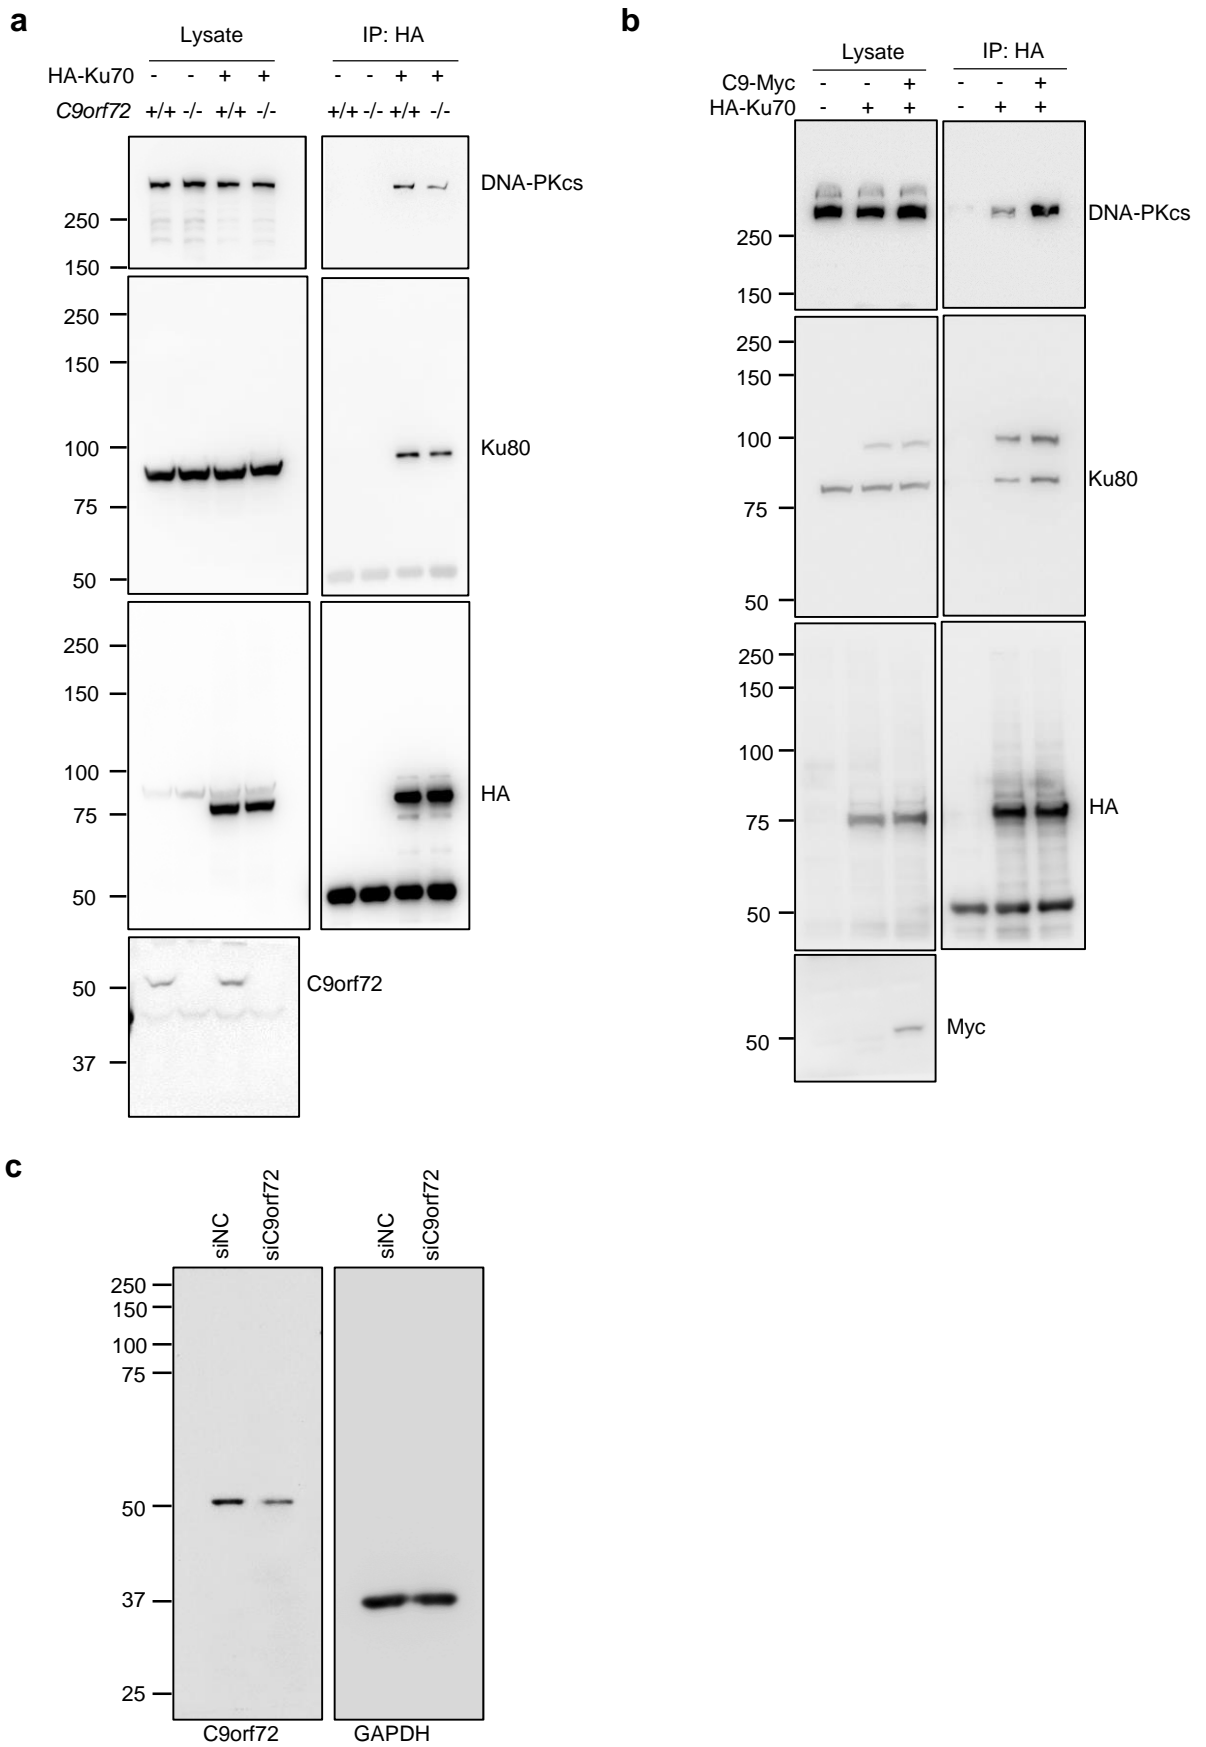

# Figure 5

**e**

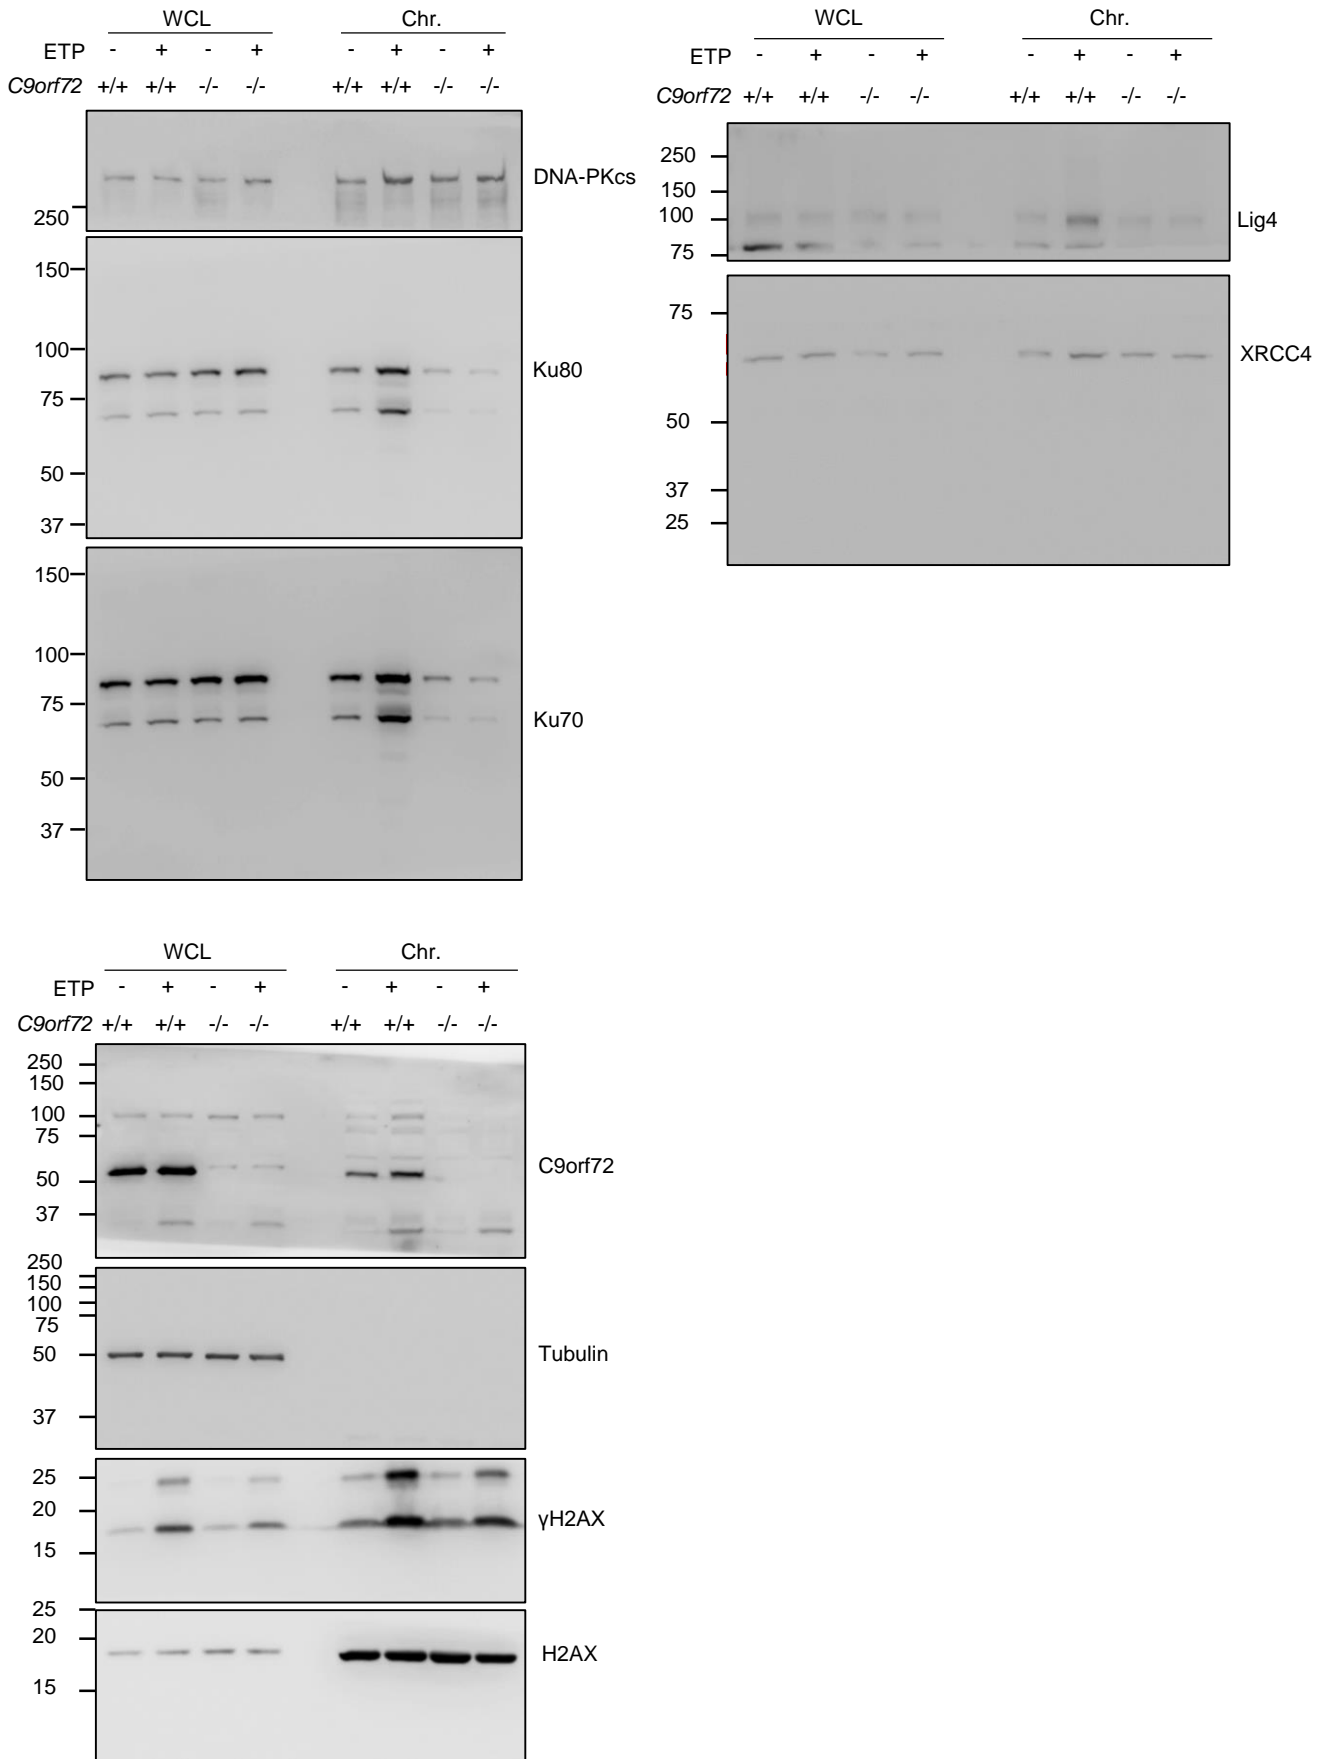

Figure 8

**b**

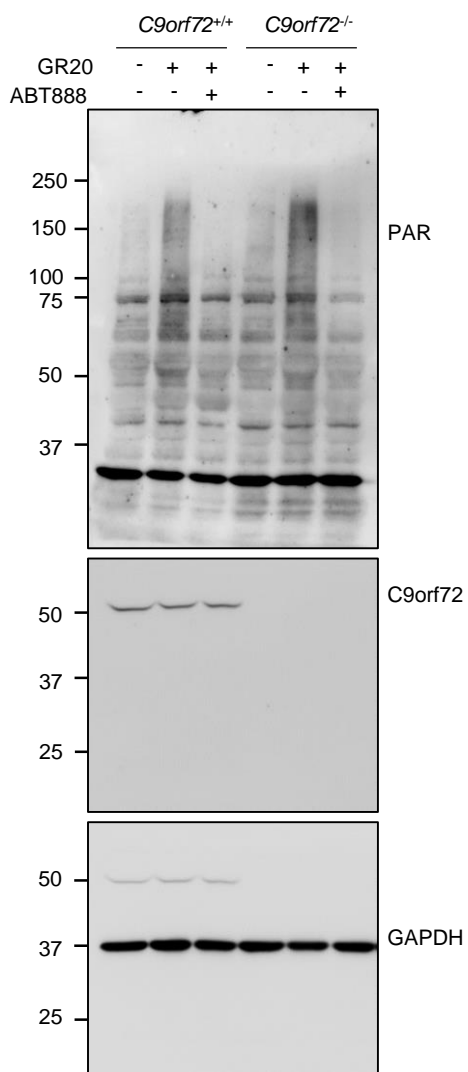

**c**

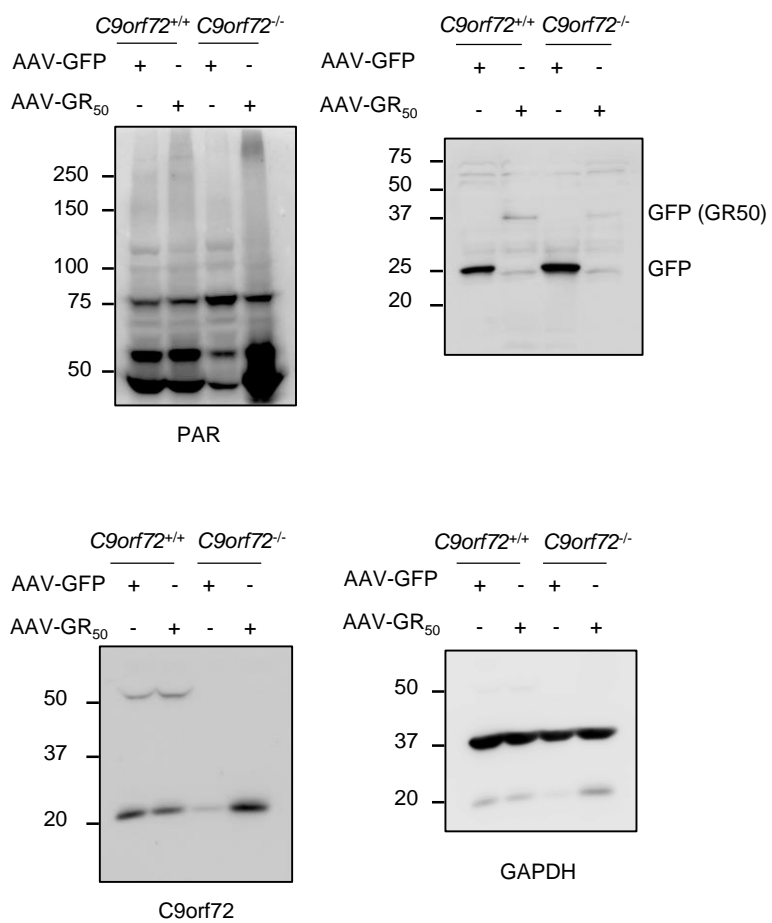

# Figure S1

**a**

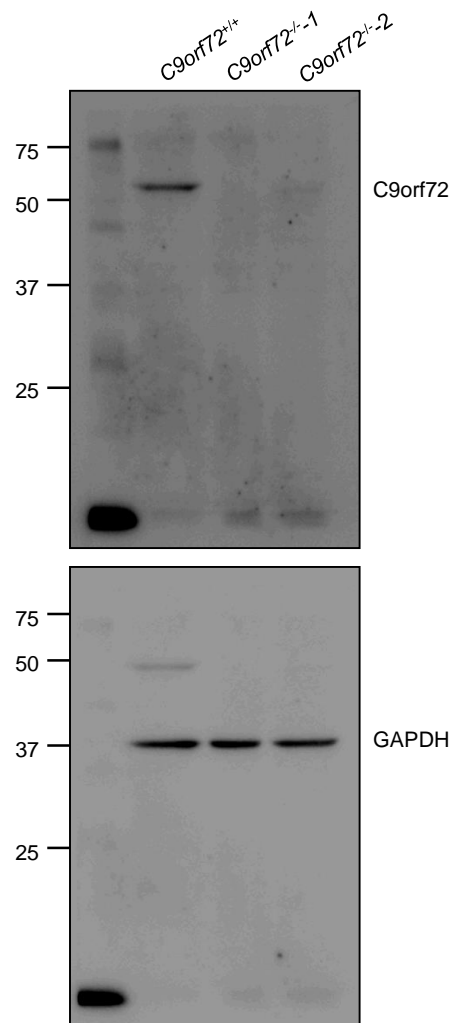



Figure S3

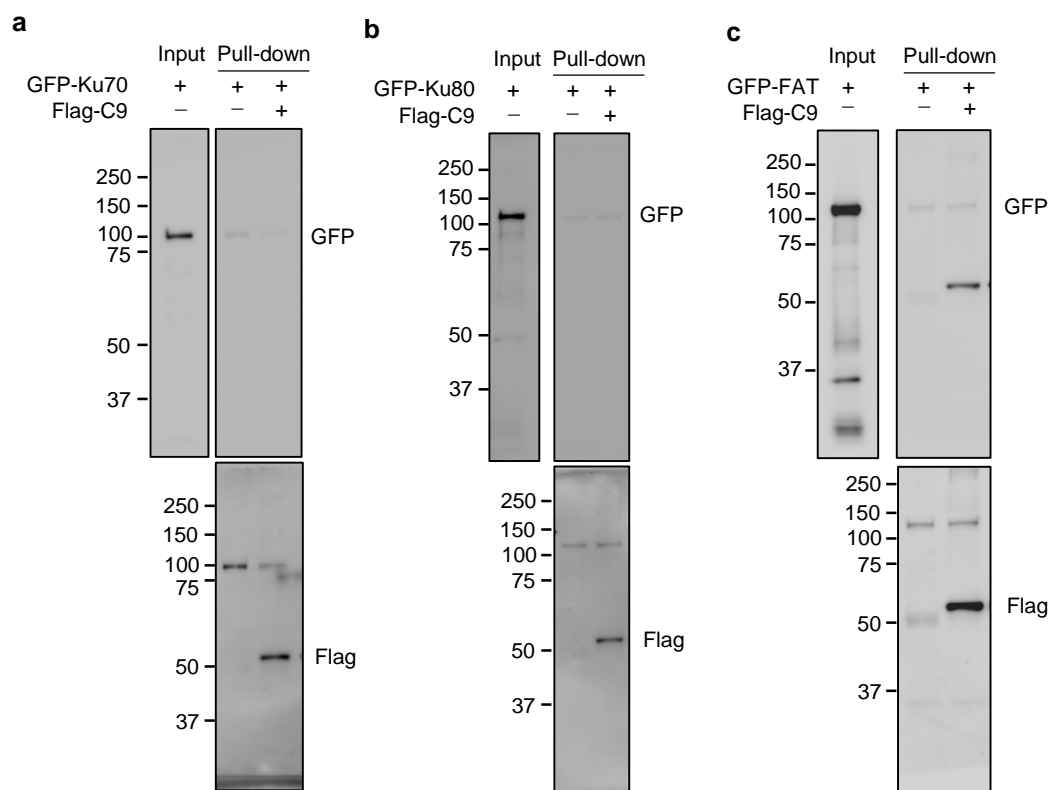

Supplement: 41418_2022_1074_MOESM3_ESM.pdf [file 41418_2022_1074_MOESM3_ESM.pdf]
